# Supplementary material
Source: HighWire-hosted journal article supplement (https://www.ajnr.org/highwire/filestream/64883/field_highwire_adjunct_files/0/18-00912.pdf)
Supplement: 18-00912.pdf [file 18-00912.pdf]

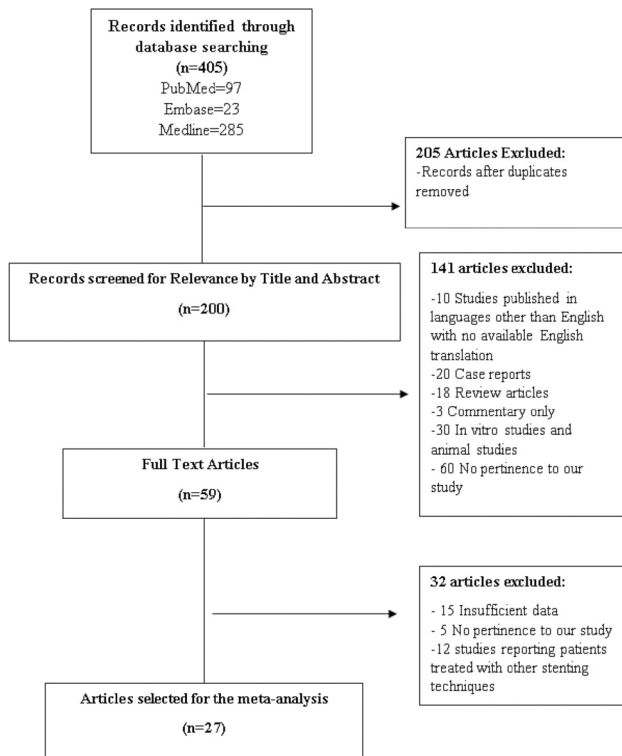

**ON-LINE FIG 1.** PRISMA diagram detailing the specifics of the systematic literature review.

| Studies                                      | Estimate (95% C.I.)         | Ev/Trt         |
|----------------------------------------------|-----------------------------|----------------|
| Thorell WE 2005                              | 0.857 (0.598, 1.000)        | 6/7            |
| Spiotta AM 2011                              | 0.842 (0.678, 1.000)        | 16/19          |
| Cekirge HS 2011                              | 0.750 (0.450, 1.000)        | 6/8            |
| Zhao KJ 2012                                 | 0.909 (0.739, 1.000)        | 10/11          |
| Lee WL 2012                                  | 0.962 (0.857, 1.000)        | 12/12          |
| Chalouhi N 2012                              | 0.812 (0.621, 1.000)        | 13/16          |
| Jankowitz BT 2012                            | 0.778 (0.506, 1.000)        | 7/9            |
| Johnson AK (only angiographic outcome) 2013  | 0.958 (0.845, 1.000)        | 11/11          |
| Fargen KM 2013                               | 0.933 (0.860, 1.000)        | 42/45          |
| Yavuz K 2013                                 | 0.957 (0.928, 0.986)        | 178/186        |
| Mohlenbruch M 2014                           | 0.944 (0.795, 1.000)        | 8/8            |
| Jeon P 2014                                  | 0.905 (0.779, 1.000)        | 19/21          |
| Heller RS 2014                               | 0.976 (0.911, 1.000)        | 20/20          |
| Akgul E 2015                                 | 0.950 (0.854, 1.000)        | 19/20          |
| Brassel F 2016                               | 0.938 (0.770, 1.000)        | 7/7            |
| Limbucci N 2016                              | 0.979 (0.939, 1.000)        | 47/48          |
| Ko JK 2015                                   | 0.969 (0.883, 1.000)        | 15/15          |
| Lee K 2016                                   | 0.955 (0.831, 1.000)        | 10/10          |
| Melber K 2017                                | 0.962 (0.857, 1.000)        | 12/12          |
| Bang JS 2016                                 | 0.850 (0.694, 1.000)        | 17/20          |
| Takano N 2017                                | 0.938 (0.770, 1.000)        | 7/7            |
| Cheung NK 2017                               | 0.938 (0.819, 1.000)        | 15/16          |
| Castano C 2017                               | 0.956 (0.895, 1.000)        | 43/45          |
| Samaniego EA 2018                            | 0.960 (0.883, 1.000)        | 24/25          |
| <b>Overall (I<sup>2</sup>=0 % , P=0.952)</b> | <b>0.954 (0.937, 0.970)</b> | <b>564/598</b> |

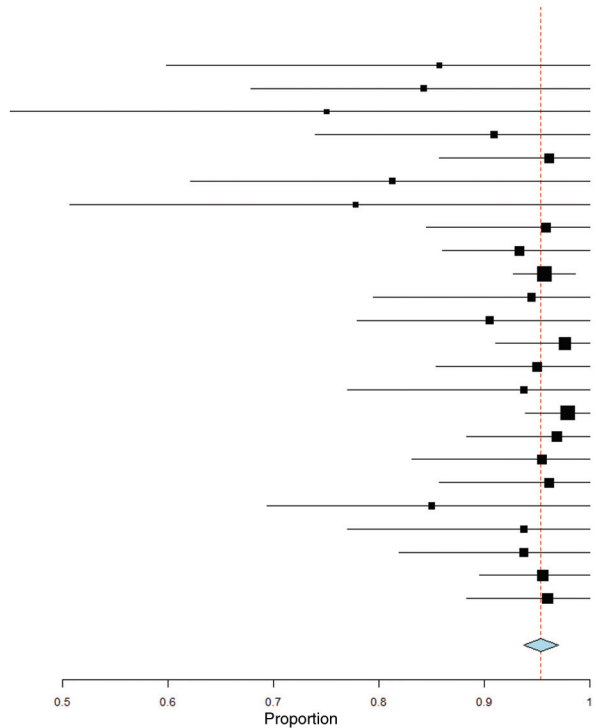

A

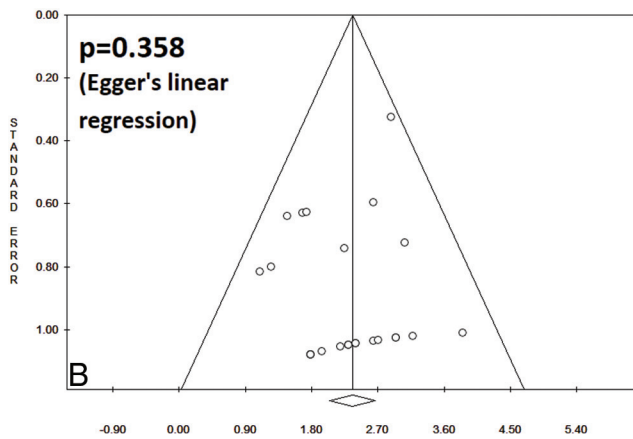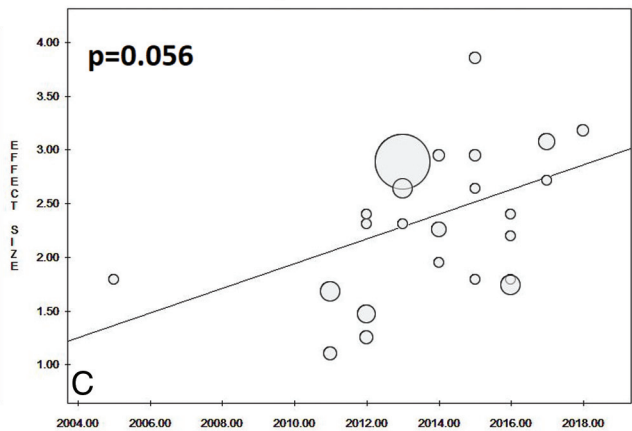

**ON-LINE FIG 2.** Forest plot demonstrating the overall rate of aneurysm occlusion after Y-stent placement (A). Meta-regression shows a nonsignificant variation of the effect size (B). The funnel plot followed by the Egger linear regression test excludes publication bias (C).

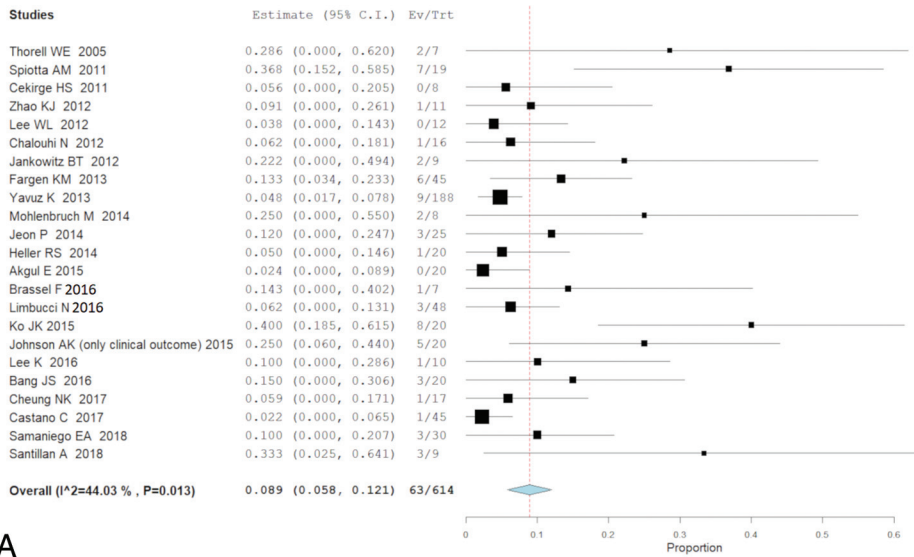

A

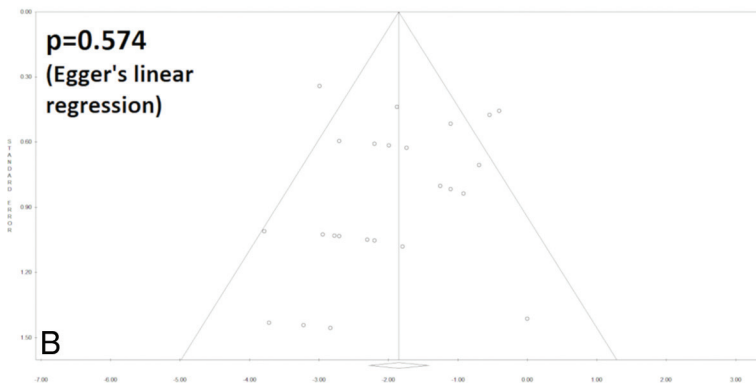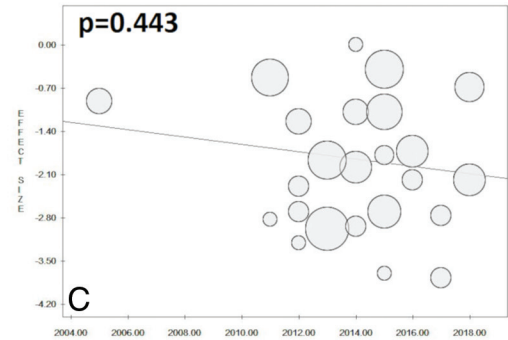

**ON-LINE FIG 3.** Forest plot demonstrates the overall rate of treatment-related complications after Y-stent placement of intracranial aneurysms (A). Meta-regression shows a nonsignificant variation of the effect size (B). The funnel plot followed by the Egger linear regression test excludes publication bias (C).

**On-line Table 1: Search syntax**

| PubMed Search Accessed on July 31, 2018 (97 Articles)                                                                                                                                                                                                               | EMBASE Search Accessed on July 31, 2018 (23 Articles) | MEDLINE Search Accessed on July 31, 2018 (285 Articles)                                                 |
|---------------------------------------------------------------------------------------------------------------------------------------------------------------------------------------------------------------------------------------------------------------------|-------------------------------------------------------|---------------------------------------------------------------------------------------------------------|
| ((Y(All Fields) AND stent(All Fields)) OR (Y(All Fields) AND stenting(All Fields))) AND (intracranial(All Fields) AND aneurysms(All Fields)) AND (((Y(All Fields) AND stent(All Fields)) OR (Y(All Fields) AND stenting(All Fields))) AND endovascular(All Fields)) | 'y stent' AND 'intracranial aneurysm'                 | ((Y stent or Y stenting) and intracranial aneurysms).af. ((Y stent or Y stenting) and endovascular).af. |
|                                                                                                                                                                                                                                                                     | 'y stent' AND endovascular                            |                                                                                                         |

**On-line Table 2: Summary of studies included in meta-analysis**

| Study Authors                        | Design | No. of Aneurysms Treated with Y-Stenting | Type of Technique      | Successful Stent Deployment | Overall Complete/Near-Complete Occlusion | Overall Rate of Treatment-Related Complications | Description of Complication                                                                                                     | Quality of Studies (NOS) |
|--------------------------------------|--------|------------------------------------------|------------------------|-----------------------------|------------------------------------------|-------------------------------------------------|---------------------------------------------------------------------------------------------------------------------------------|--------------------------|
| Thorell et al 2005 <sup>31</sup>     | R      | 7                                        | Crossing               | 6/7                         | 6/7                                      | 2/7                                             | 2 Periprocedural thromboembolic events                                                                                          | 4                        |
| Spiotta et al 2011 <sup>27</sup>     | R      | 19                                       | Crossing               | 18/19                       | 16/19                                    | 7/19                                            | 1 Perforation + 1 dissection + 3 periprocedural thromboembolic events + 2 delayed ischemic complications                        | 4                        |
| Cekirge et al 2011 <sup>14</sup>     | R      | 8                                        | Crossing               | 8/8                         | 6/8                                      | 0/8                                             | 1 Periprocedural thromboembolic event                                                                                           | 4                        |
| Zhao et al 2012 <sup>32</sup>        | R      | 11                                       | 7 Crossing + 4 kissing | 11/11                       | 10/11                                    | 1/11                                            |                                                                                                                                 | 4                        |
| Lee et al 2012 <sup>33</sup>         | R      | 12                                       | Crossing               | 12/12                       | 12/12                                    | 0/12                                            |                                                                                                                                 | 4                        |
| Chalouhi et al 2012 <sup>34</sup>    | R      | 16                                       | Crossing               | NA                          | 13/16                                    | 1/16                                            | 1 Periprocedural thromboembolic event                                                                                           | 4                        |
| Jankowitz et al 2012 <sup>19</sup>   | R      | 9                                        | Kissing                | 9/9                         | 7/9                                      | 2/9                                             | 1 Intraprocedural aneurysm perforation + 1 delayed in-stent occlusion                                                           | 4                        |
| Johnson et al 2013 <sup>35</sup>     | R      | 11                                       | Crossing               | 10/11                       | 11/11                                    | NA                                              |                                                                                                                                 | 4                        |
| Fargen et al 2013 <sup>12</sup>      | RMC    | 45                                       | Crossing               | 42/45                       | 42/45                                    | 6/45                                            | 2 Intraprocedural aneurysm perforations + 3 cases of cranial nerve palsy + 1 periprocedural thromboembolic event                | 4                        |
| Yavuz et al 2013 <sup>13</sup>       | R      | 193 (188 Patients)                       | Crossing               | 193/196                     | 178/186                                  | 9/188                                           | 3 Intraprocedural aneurysm perforations + 2 periprocedural and 4 delayed thromboembolic events                                  | 4                        |
| Bartolini et al 2014 <sup>18</sup>   | R      | 87                                       | Crossing               | NA                          | NA                                       | NA                                              | 1 Delayed in-stent occlusion                                                                                                    | 4                        |
| Möhlenbruch et al 2014 <sup>36</sup> | R      | 8                                        | Crossing               | 8/8                         | 8/8                                      | 2/8                                             | 2 Acute in-stent occlusions                                                                                                     | 4                        |
| Jeon et al 2014 <sup>17</sup>        | R      | 25                                       | Crossing               | NA                          | 19/21                                    | 3/25                                            | 3 Periprocedural thromboembolic events                                                                                          | 4                        |
| Heller et al 2014 <sup>37</sup>      | R      | 22                                       | Crossing               | 20/22                       | 20/20                                    | 1/20                                            | 1 Acute in-stent occlusion                                                                                                      | 4                        |
| Akgul et al 2015 <sup>29</sup>       | R      | 20                                       | Crossing               | 20/20                       | 19/20                                    | 0/20                                            | 1 Periprocedural thromboembolic event                                                                                           | 4                        |
| Brassel et al 2016 <sup>25</sup>     | R      | 7                                        | Kissing                | 7/7                         | 7/7                                      | 1/7                                             | 2 Intraprocedural aneurysm perforations + 1 delayed ischemic event after discontinuation of antiplatelet therapy                | 4                        |
| Limucci et al 2016 <sup>8</sup>      | R      | 52                                       | Crossing               | 48/52                       | 47/48                                    | 3/48                                            | 4 Acute in-stent occlusions + 1 delayed in-stent occlusion + 1 dissection + 1 intraprocedural aneurysm ruptures + 1 PCA infarct | 4                        |
| Ko et al 2015 <sup>50</sup>          | R      | 20                                       | Crossing               | 20/20                       | 15/15                                    | 8/20                                            |                                                                                                                                 | 4                        |
| Johnson et al 2015 <sup>38</sup>     | R      | 20                                       | Crossing               | NA                          | NA                                       | 5/20 (NA)                                       |                                                                                                                                 | 4                        |
| Lee et al 2016 <sup>23</sup>         | R      | 10                                       | Crossing               | NA                          | 10/10                                    | 1/10                                            | 1 Acute in-stent occlusion                                                                                                      | 4                        |
| Melber et al 2017 <sup>29</sup>      | R      | 20                                       | Kissing                | 20/20                       | 12/12                                    | NA                                              |                                                                                                                                 | 3                        |
| Bang et al 2016 <sup>50</sup>        | R      | 20 (19 Patients)                         | Crossing               | 18/20                       | 17/20                                    | 3/20                                            | 3 Ischemic events                                                                                                               | 3                        |
| Takano et al 2017 <sup>30</sup>      | R      | 7                                        | Crossing               | 7/7                         | 7/7                                      | NA                                              |                                                                                                                                 | 3                        |
| Cheung et al 2018 <sup>41</sup>      | R      | 17                                       | Crossing               | 17/17                       | 15/16                                    | 1/17                                            | 1 Intraprocedural aneurysm perforation                                                                                          | 4                        |
| Castano et al 2017 <sup>26</sup>     | R      | 45                                       | Crossing               | 45/45                       | 43/45                                    | 1/45                                            | 1 Acute in-stent occlusion                                                                                                      | 4                        |
| Samaniego et al 2018 <sup>24</sup>   | RMC    | 30                                       | Crossing               | 28/30                       | 24/25                                    | 3/30                                            | 1 Acute in-stent occlusion + 1 PCA infarct + 1 ischemic temporal lesion                                                         | 4                        |
| Santillan et al 2018 <sup>28</sup>   | R      | 9                                        | Crossing               | NA                          | NA                                       | 3/9                                             | 3 Acute in-stent occlusions                                                                                                     | 3                        |

**Note:**—R indicates retrospective study; RMC, retrospective multicentric study; NOS, Newcastle–Ottawa Scale; NA, not available; PCA, posterior cerebral artery.

**On-line Table 3: Quality measure of included studies by the Newcastle-Ottawa quality assessment scale<sup>a</sup>**

| Study Authors                        | Selection |   |   |   | Comparability |   | Exposure |   |   | Total |   |
|--------------------------------------|-----------|---|---|---|---------------|---|----------|---|---|-------|---|
|                                      | 1         | 2 | 3 | 4 | a             | b | 1        | 2 | 3 |       |   |
| Akgul et al, 2015 <sup>29</sup>      | *         | * |   |   |               | * | *        |   |   |       | 4 |
| Brassel et al 2016 <sup>25</sup>     | *         | * |   |   |               | * | *        |   |   |       | 4 |
| Limbucci et al 2016 <sup>8</sup>     | *         | * |   |   |               | * | *        |   |   |       | 4 |
| Johnson et al 2013 <sup>35</sup>     | *         | * |   |   |               | * | *        |   |   |       | 4 |
| Johnson et al 2015 <sup>38</sup>     | *         | * |   |   |               | * | *        |   |   |       | 4 |
| Lee et al 2012 <sup>33</sup>         | *         | * |   |   |               | * | *        |   |   |       | 4 |
| Fargen et al 2013 <sup>12</sup>      | *         | * |   |   |               | * | *        |   |   |       | 4 |
| Lee et al 2016 <sup>23</sup>         | *         | * |   |   |               | * | *        |   |   |       | 4 |
| Thorell et al 2005 <sup>31</sup>     | *         | * |   |   |               | * | *        |   |   |       | 4 |
| Yavuz et al 2013 <sup>13</sup>       | *         | * |   |   |               | * | *        |   |   |       | 4 |
| Jankowitz et al 2012 <sup>19</sup>   | *         | * |   |   |               | * | *        |   |   |       | 4 |
| Zhao et al 2012 <sup>32</sup>        | *         | * |   |   |               | * | *        |   |   |       | 4 |
| Castaño et al 2017 <sup>26</sup>     | *         | * |   |   |               | * | *        |   |   |       | 4 |
| Takano et al 2017 <sup>30</sup>      | *         | * |   |   |               |   | *        |   |   |       | 3 |
| Spiotta et al 2011 <sup>27</sup>     | *         | * |   |   |               | * | *        |   |   |       | 4 |
| Samaniego et al 2018 <sup>24</sup>   | *         | * |   |   |               | * | *        |   |   |       | 4 |
| Santillan et al 2018 <sup>28</sup>   | *         | * |   |   |               |   | *        |   |   |       | 3 |
| Möhlenbruch et al 2014 <sup>36</sup> | *         | * |   |   |               | * | *        |   |   |       | 4 |
| Bang et al 2016 <sup>40</sup>        | *         | * |   |   |               |   | *        |   |   |       | 3 |
| Melber et al 2017 <sup>39</sup>      | *         | * |   |   |               |   | *        |   |   |       | 3 |
| Jeon et al 2014 <sup>17</sup>        | *         | * |   |   |               | * | *        |   |   |       | 4 |
| Cekirge et al 2011 <sup>14</sup>     | *         | * |   |   |               | * | *        |   |   |       | 4 |
| Chalouhi et al 2012 <sup>34</sup>    | *         | * |   |   |               | * | *        |   |   |       | 4 |
| Cheung et al 2018 <sup>41</sup>      | *         | * |   |   |               | * | *        |   |   |       | 4 |
| Heller et al 2014 <sup>37</sup>      | *         | * |   |   |               | * | *        |   |   |       | 4 |
| Ko et al 2015 <sup>20</sup>          | *         | * |   |   |               | * | *        |   |   |       | 4 |
| Bartolini et al 2014 <sup>18</sup>   | *         | * |   |   |               | * | *        |   |   |       | 4 |

<sup>a</sup> Newcastle-Ottawa Scale for quality assessment for retrospective studies (retrospective design; score 0–8; studies with ≥5 asterisks were considered high-quality).

Selection

1) Is the case definition adequate?

- a) Yes, with independent validation\*
- b) Yes, eg record linkage or based on self-reports
- c) No description

2) Representativeness of the cases

- a) Consecutive or obviously representative series of cases\*
- b) Potential for selection biases or not stated

3) Selection of controls

- a) Community controls\*
- b) Hospital controls
- c) No description

4) Definition of controls

- a) No history of disease (end point)\*
- b) No description of source

Comparability

1) Comparability of cases and controls on the basis of the design or analysis

- a) Study controls for (select the most important factor)\*
- b) Study controls for any additional factor\*; this criterion could be modified to indicate a specific control for a second important factor

Comparability (point a) was not tested because of the design of the reported studies

Comparability (point b) was tested comparing subgroups of analysis: One point was given if the study reported the analysis of the subgroups (anterior vs posterior circulation; ruptured vs unruptured, and so forth)

Exposure

1) Ascertainment of exposure

- a) Secure record (eg surgical records)\*
- b) Structured interview blinded to case/control status\*
- c) Interview not blinded to case/control status
- d) Written self-report or medical record only
- e) No description

2) Same method of ascertainment for cases and controls

- a) Yes\*
- b) No

3) Nonresponse rate

- a) Same rate for both groups\*
- b) Nonrespondents described
- c) Rate different and no designation.

**On-line Table 4: Patient population and characteristics of intracranial aneurysms treated with Y-stenting**

| Variables                                                                                | Raw Numbers (%)                              | No. of Articles | 95% CI  |
|------------------------------------------------------------------------------------------|----------------------------------------------|-----------------|---------|
| Population characteristics                                                               |                                              |                 |         |
| No. of patients                                                                          | 744                                          | 27              |         |
| Mean/median age (yr)                                                                     | 56.6/57 (22–80)                              | 15              |         |
| Proportion male                                                                          | 194/538 = 36%                                | 16              | 32–40   |
| Aneurysm characteristics                                                                 |                                              |                 |         |
| No. of aneurysms                                                                         | 750                                          | 27              |         |
| Proportion of acutely ruptured aneurysms                                                 | 66/592 = 11%                                 | 21              | 8.5–14  |
| Aneurysm location                                                                        |                                              |                 |         |
| Anterior circulation                                                                     | 366/601 = 61%                                |                 | 56–64   |
| Posterior circulation                                                                    | 235/601 = 39%                                | 22              | 35–43   |
| Specific aneurysm location                                                               |                                              |                 |         |
| BT                                                                                       | 235/601 = 39%                                |                 | 35–43   |
| MCA                                                                                      | 206/601 = 34.4%                              |                 | 30–38   |
| AcomA                                                                                    | 120/601 = 20%                                | 22              | 16–23   |
| A2A3                                                                                     | 10/601 = 1.6%                                |                 | 0.8–3   |
| ICA bif                                                                                  | 30/601 = 5%                                  |                 | 3–8     |
| Mean aneurysm size (mm)                                                                  | 9.6 (median, 9.9; IQR = 8–10.5; range, 3–25) | 23              |         |
| Treatment characteristics                                                                |                                              |                 |         |
| Type of stent/total of stents used                                                       |                                              |                 |         |
| Enterprise                                                                               | 476/1060 = 45%                               |                 | 42–47   |
| Neuroform                                                                                | 332/1060 = 31.3%                             |                 | 28–40   |
| LVIS                                                                                     | 132/1060 = 12.5%                             | 23              | 10–14   |
| Solitaire                                                                                | 66/1060 = 6.2%                               |                 | 4.9–7.8 |
| Acclino flex Stent                                                                       | 54/1060 = 5%                                 |                 | 3.9–6.6 |
| No. of aneurysms treated with nonhybrid technique (closed/closed-cell or open/open-cell) | 512/585 = 87.5%                              | 23              | 84–98   |
| No. of aneurysms treated with hybrid technique (closed/open-cell stents)                 | 73/585 = 12.5%                               | 23              | 10–15   |
| No. of aneurysms treated with crossing technique                                         | 688/750 = 92%                                | 27              | 89–93   |
| No. of aneurysms treated with kissing technique                                          | 60/750 = 8%                                  | 27              | 6–10    |
| Radiologic follow-up (mo)                                                                |                                              |                 |         |
|                                                                                          | Mean: 14 (range, 6–24)                       | 20              |         |
|                                                                                          | Median: 12 (IQR = 10–18)                     |                 |         |
| Clinical follow-up (mo)                                                                  |                                              |                 |         |
|                                                                                          | Mean: 17 (range, 3–30)                       | 10              |         |
|                                                                                          | Median: 16.5 (IQR = 7.8–21)                  |                 |         |

**Note:**—BT indicates basilar tip; AcomA, anterior communicating artery; A2A3, distal anterior cerebral artery; ICA bif, internal carotid artery bifurcation.

**On-line Table 5: Factors related to aneurysm occlusion and treatment-related complications after Y-stenting of intracranial bifurcation aneurysms<sup>a</sup>**

| Variables                            | Complete/Near-Complete Occlusion                 | No. of Articles | P Value          | Treatment-Related Complications                                                                                                                                         | No. of Articles | P Value          |
|--------------------------------------|--------------------------------------------------|-----------------|------------------|-------------------------------------------------------------------------------------------------------------------------------------------------------------------------|-----------------|------------------|
| Aneurysm-related factors             |                                                  |                 |                  |                                                                                                                                                                         |                 |                  |
| Unruptured aneurysms                 | 180/194 = 95%<br>(92–98) (I <sup>2</sup> = 0%)   | 14              |                  | 29/236 = 8%<br>(4.5–13) (I <sup>2</sup> = 36%)                                                                                                                          | 16              |                  |
| vs                                   |                                                  |                 | .2               |                                                                                                                                                                         |                 | .02 <sup>b</sup> |
| Ruptured aneurysms                   | 40/43 = 90%<br>(84–99) (I <sup>2</sup> = 0%)     | 10              |                  | 11/52 = 18%<br>(7–28) (I <sup>2</sup> = 21%)                                                                                                                            | 11              |                  |
| Small- or medium-sized aneurysms     | 98/107 = 92%<br>(86–96) (I <sup>2</sup> = 0%)    | 9               |                  | 14/106 = 9%<br>(5–30) (I <sup>2</sup> = 0%)                                                                                                                             | 9               |                  |
| vs                                   |                                                  |                 | .02 <sup>b</sup> |                                                                                                                                                                         |                 | .16              |
| Large and very large/giant aneurysms | 33/43 = 79%<br>(67–91) (I <sup>2</sup> = 25%)    | 8               |                  | 9/43 = 17%<br>(6–27) (I <sup>2</sup> = 10%)                                                                                                                             | 8               |                  |
| Anterior circulation                 |                                                  | 13              |                  | 14/109 = 13%<br>(5–24) (I <sup>2</sup> = 56%)                                                                                                                           | 12              |                  |
| vs                                   | 98/103 = 92%<br>(87–97) (I <sup>2</sup> = 0%)    |                 |                  | Ischemic 10/109 = 8.5%<br>(1.5–13) (I <sup>2</sup> = 15%)<br>Hemorrhagic 4/109 = 4%<br>(0.8–6) (I <sup>2</sup> = 0%)                                                    |                 |                  |
|                                      |                                                  |                 | .27              |                                                                                                                                                                         |                 | .14              |
| Posterior circulation                | 133/150 = 90%<br>(85–94) (I <sup>2</sup> = 0%)   | 16              |                  | 17/141 = 9.5%<br>(5.8–15) (I <sup>2</sup> = 66%)<br>Ischemic 16/141 = 8.5%<br>(4–12) (I <sup>2</sup> = 0%)<br>Hemorrhagic 1/141 = 0.7%<br>(0.3–6) (I <sup>2</sup> = 0%) | 16              |                  |
| MCA aneurysms                        | 52/54 = 94.9%<br>(89–97) (I <sup>2</sup> = 0%)   | 10              |                  | 4/54 = 7%<br>(4–14) (I <sup>2</sup> = 0%)                                                                                                                               | 10              |                  |
| BT aneurysms                         | 126/145 = 88.8%<br>(83–93) (I <sup>2</sup> = 0%) | 16              |                  | 14/110 = 10%<br>(5–16) (I <sup>2</sup> = 0%)                                                                                                                            | 14              |                  |
| ACA aneurysms                        | 42/46 = 87%<br>(78–96) (I <sup>2</sup> = 0%)     | 10              |                  | 10/49 = 23%<br>(8–38) (I <sup>2</sup> = 49%)                                                                                                                            | 10              |                  |
| Patient-related factors              |                                                  |                 |                  |                                                                                                                                                                         |                 |                  |
| Younger than 60 years                | 82/89 = 92%<br>(61–97) (I <sup>2</sup> = 93%)    | 10              |                  | 8/80 = 7.4%<br>(2–12) (I <sup>2</sup> = 0%)                                                                                                                             | 9               |                  |
| vs                                   |                                                  |                 | .5               |                                                                                                                                                                         |                 | .6               |
| Older than 60 years                  | 65/73 = 89%<br>(82–96) (I <sup>2</sup> = 0%)     | 9               |                  | 9/73 = 8.7%<br>(3–15) (I <sup>2</sup> = 10%)                                                                                                                            | 9               |                  |
| Treatment-related factors            |                                                  |                 |                  |                                                                                                                                                                         |                 |                  |
| Crossing technique                   | 526/556 = 95%<br>(93–97) (I <sup>2</sup> = 0%)   | 20              |                  | 56/572 = 8.4%<br>(5–11) (I <sup>2</sup> = 46%)                                                                                                                          | 21              |                  |
| vs                                   |                                                  |                 | .2               |                                                                                                                                                                         |                 | .4               |
| Kissing technique                    | 26/30 = 90%<br>(80–96) (I <sup>2</sup> = 9%)     | 4               |                  | 4/30 = 12.7%<br>(3–24) (I <sup>2</sup> = 0%)                                                                                                                            | 4               |                  |
| First treatment                      | 119/128 = 94%<br>(89–98) (I <sup>2</sup> = 0%)   | 11              |                  | 13/128 = 7.6%<br>(32–12) (I <sup>2</sup> = 0%)                                                                                                                          | 11              |                  |
| vs                                   |                                                  |                 | .01 <sup>b</sup> |                                                                                                                                                                         |                 | .19              |
| Retreatment                          | 40/48 = 82%<br>(71–92) (I <sup>2</sup> = 0%)     | 6               |                  | 7/48 = 14%<br>(6–25) (I <sup>2</sup> = 0%)                                                                                                                              | 6               |                  |
| Nonhybrid technique                  | 285/305 = 95%<br>(93–97) (I <sup>2</sup> = 0%)   | 18              |                  | 38/305 = 10%<br>(5–14) (I <sup>2</sup> = 48%)                                                                                                                           | 18              |                  |
| vs                                   |                                                  |                 | .2               |                                                                                                                                                                         |                 | .6               |
| Hybrid technique                     | 35/38 = 90%<br>(81–95) (I <sup>2</sup> = 0%)     | 4               |                  | 3/36 = 7.5%<br>(1–15) (I <sup>2</sup> = 0%)                                                                                                                             | 3               |                  |

**Note:**—BT indicates basilar tip; ACA, anterior cerebral artery.

<sup>a</sup> Numbers in parentheses indicate 95% confidence interval.

<sup>b</sup> Significant.

**On-line Table 6. Association between type of stent used and treatment-related outcomes after Y-stenting of intracranial aneurysms**

| Type of Stent         | Complete/Near-Complete Occlusion (95% CI) (I <sup>2</sup> ) | Treatment-Related Complications (95% CI) (I <sup>2</sup> ) | No. of Articles |
|-----------------------|-------------------------------------------------------------|------------------------------------------------------------|-----------------|
| Enterprise            | 98/101 = 96%<br>(93–98) (0%)                                | 8/99 = 6.5%<br>(1.6–11) (0%)                               | 6               |
| Neuroform             | 119/130 = 94%<br>(90–98) (14%)                              | 20/131 = 14%<br>(5–26) (69%)                               | 8               |
| Braided stents (LVIS) | 52/56 = 92%<br>(85–99) (0%)                                 | 9/64 = 11%<br>(3–20) (18%)                                 | 5               |
